# Supplementary material for: The landscape of DNA repeat elements in human heart failure
Source: PubMed Central journal article supplement (PMC3491418; doi:10.1186/gb-2012-13-10-r90), 2012-10-03
Supplement: gb-2012-13-10-r90-S4.pdf [file gb-2012-13-10-r90-S4.pdf]

| Repeat    | Family | Class | Normal      |             |             |             | Diseased (Dilated) |             | Diseased (Ischaemic) |             |
|-----------|--------|-------|-------------|-------------|-------------|-------------|--------------------|-------------|----------------------|-------------|
|           |        |       | CTRL1 (s01) | CTRL2 (s02) | CTRL3 (S03) | CTRL4 (s04) | EsCM1 (s06)        | EsCM2 (s07) | EsCM3 (s12)          | EsCM4 (s13) |
| HERVK     | ERV2   | LTR   | 1725        | 1480        | 1513        | 1497        | 1456               | 1329        | 1517                 | 1630        |
| HERVK11DI | ERV2   | LTR   | 84          | 78          | 54          | 65          | 65                 | 55          | 69                   | 49          |
| HERVK11I  | ERV2   | LTR   | 352         | 392         | 343         | 327         | 317                | 282         | 288                  | 326         |
| HERVK13I  | ERV2   | LTR   | 35          | 24          | 17          | 16          | 20                 | 33          | 21                   | 25          |
| HERVK22I  | ERV2   | LTR   | 272         | 276         | 202         | 238         | 212                | 186         | 181                  | 197         |
| HERVK3I   | ERV2   | LTR   | 50          | 69          | 54          | 61          | 47                 | 52          | 46                   | 56          |
| HERVK9I   | ERV2   | LTR   | 913         | 865         | 697         | 764         | 644                | 595         | 591                  | 608         |
| HERVKC4   | ERV2   | LTR   | 36          | 25          | 30          | 36          | 21                 | 21          | 19                   | 19          |
| LTR13     | ERV2   | LTR   | 1275        | 900         | 648         | 830         | 902                | 1323        | 1130                 | 1440        |
| LTR13A    | ERV2   | LTR   | 667         | 515         | 328         | 437         | 400                | 511         | 460                  | 589         |
| LTR14     | ERV2   | LTR   | 27          | 24          | 35          | 34          | 28                 | 24          | 19                   | 19          |
| LTR14A    | ERV2   | LTR   | 151         | 142         | 114         | 131         | 140                | 146         | 133                  | 188         |
| LTR14B    | ERV2   | LTR   | 125         | 122         | 106         | 105         | 99                 | 129         | 86                   | 156         |
| LTR14C    | ERV2   | LTR   | 129         | 107         | 78          | 87          | 92                 | 80          | 77                   | 94          |
| LTR22     | ERV2   | LTR   | 30          | 28          | 20          | 31          | 24                 | 29          | 32                   | 28          |
| LTR22A    | ERV2   | LTR   | 36          | 40          | 32          | 31          | 27                 | 43          | 40                   | 36          |
| LTR22B1   | ERV2   | LTR   | 14          | 13          | 13          | 15          | 11                 | 14          | 15                   | 16          |
| LTR22C0   | ERV2   | LTR   | 26          | 23          | 11          | 22          | 11                 | 18          | 13                   | 23          |
| LTR3      | ERV2   | LTR   | 15          | 22          | 15          | 12          | 16                 | 23          | 23                   | 26          |
| LTR3A     | ERV2   | LTR   | 86          | 86          | 64          | 77          | 74                 | 96          | 74                   | 89          |
| LTR3B     | ERV2   | LTR   | 93          | 69          | 75          | 75          | 73                 | 75          | 61                   | 63          |
| LTR5      | ERV2   | LTR   | 1686        | 1673        | 1459        | 1541        | 1403               | 1317        | 1330                 | 1518        |
| LTR5A     | ERV2   | LTR   | 366         | 340         | 285         | 351         | 261                | 250         | 281                  | 284         |
| LTR5B     | ERV2   | LTR   | 985         | 880         | 770         | 930         | 885                | 887         | 972                  | 991         |
| LTR5_Hs   | ERV2   | LTR   | 1993        | 1998        | 1797        | 1918        | 1912               | 1930        | 1724                 | 1895        |
| MER11A    | ERV2   | LTR   | 665         | 644         | 561         | 539         | 474                | 567         | 481                  | 519         |
| MER11B    | ERV2   | LTR   | 879         | 730         | 620         | 696         | 607                | 663         | 647                  | 724         |
| MER11C    | ERV2   | LTR   | 816         | 751         | 589         | 688         | 563                | 596         | 526                  | 655         |
| MER11D    | ERV2   | LTR   | 427         | 405         | 282         | 302         | 232                | 285         | 259                  | 302         |
| MER9      | ERV2   | LTR   | 76          | 49          | 55          | 55          | 42                 | 43          | 43                   | 35          |
| MER9B     | ERV2   | LTR   | 46          | 38          | 35          | 36          | 34                 | 48          | 36                   | 46          |
| MER9a1    | ERV2   | LTR   | 393         | 341         | 295         | 313         | 273                | 267         | 239                  | 294         |
| MER9a2    | ERV2   | LTR   | 142         | 127         | 105         | 120         | 85                 | 97          | 74                   | 80          |
| MER9a3    | ERV2   | LTR   | 202         | 235         | 181         | 203         | 180                | 206         | 162                  | 162         |
| L1        | L1     | LINE  | 68467       | 64639       | 49958       | 56691       | 50583              | 51048       | 49236                | 55058       |
| L1HS      | L1     | LINE  | 97388       | 89059       | 92903       | 82389       | 72874              | 73310       | 284243               | 158769      |
| L1M1B_5   | L1     | LINE  | 15          | 17          | 6           | 2           | 10                 | 9           | 8                    | 12          |
| L1M1_5    | L1     | LINE  | 291         | 361         | 169         | 219         | 189                | 169         | 163                  | 204         |
| L1M2C_5   | L1     | LINE  | 25          | 31          | 13          | 21          | 15                 | 19          | 14                   | 21          |
| L1M2_5    | L1     | LINE  | 67          | 57          | 52          | 50          | 42                 | 41          | 40                   | 43          |
| L1M4B     | L1     | LINE  | 17          | 14          | 10          | 12          | 10                 | 14          | 6                    | 12          |
| L1MA1     | L1     | LINE  | 338         | 287         | 138         | 219         | 165                | 171         | 132                  | 195         |
| L1MA10    | L1     | LINE  | 34          | 26          | 10          | 12          | 18                 | 15          | 9                    | 13          |
| L1MA2     | L1     | LINE  | 142         | 130         | 74          | 110         | 91                 | 95          | 95                   | 92          |
| L1MA3     | L1     | LINE  | 125         | 143         | 86          | 92          | 65                 | 85          | 53                   | 59          |
| L1MA4     | L1     | LINE  | 327         | 311         | 187         | 169         | 167                | 147         | 118                  | 160         |
| L1MA4A    | L1     | LINE  | 294         | 315         | 186         | 209         | 165                | 169         | 129                  | 206         |

|             |    |      |       |       |      |      |      |       |      |       |
|-------------|----|------|-------|-------|------|------|------|-------|------|-------|
| L1MA5       | L1 | LINE | 151   | 150   | 94   | 95   | 79   | 71    | 59   | 114   |
| L1MA5A      | L1 | LINE | 243   | 245   | 124  | 150  | 131  | 130   | 87   | 155   |
| L1MA6       | L1 | LINE | 258   | 212   | 129  | 132  | 153  | 118   | 86   | 169   |
| L1MA7       | L1 | LINE | 120   | 123   | 68   | 84   | 91   | 70    | 60   | 76    |
| L1MA8       | L1 | LINE | 133   | 146   | 74   | 80   | 85   | 63    | 59   | 81    |
| L1MA9       | L1 | LINE | 70    | 83    | 46   | 57   | 61   | 49    | 42   | 57    |
| L1MB1       | L1 | LINE | 58    | 72    | 46   | 50   | 42   | 46    | 44   | 44    |
| L1MB2       | L1 | LINE | 182   | 167   | 89   | 87   | 110  | 80    | 74   | 99    |
| L1MB3       | L1 | LINE | 308   | 292   | 221  | 222  | 207  | 179   | 158  | 230   |
| L1MB3_5     | L1 | LINE | 16    | 8     | 9    | 14   | 11   | 17    | 6    | 12    |
| L1MB4       | L1 | LINE | 103   | 92    | 78   | 64   | 59   | 60    | 48   | 54    |
| L1MB5       | L1 | LINE | 76    | 77    | 55   | 65   | 56   | 58    | 41   | 43    |
| L1MB7       | L1 | LINE | 44    | 46    | 36   | 26   | 20   | 24    | 11   | 19    |
| L1MB8       | L1 | LINE | 59    | 62    | 53   | 46   | 43   | 34    | 31   | 37    |
| L1MC1       | L1 | LINE | 153   | 173   | 111  | 115  | 102  | 94    | 82   | 111   |
| L1MC2       | L1 | LINE | 71    | 72    | 38   | 41   | 47   | 51    | 37   | 36    |
| L1MC3       | L1 | LINE | 37    | 39    | 20   | 17   | 18   | 22    | 21   | 21    |
| L1MCA_5     | L1 | LINE | 37    | 35    | 21   | 23   | 17   | 26    | 16   | 26    |
| L1MD1       | L1 | LINE | 20    | 19    | 14   | 12   | 14   | 12    | 11   | 17    |
| L1MD2       | L1 | LINE | 45    | 37    | 16   | 20   | 20   | 15    | 13   | 22    |
| L1MDA_5     | L1 | LINE | 16    | 14    | 7    | 11   | 6    | 13    | 6    | 8     |
| L1ME1       | L1 | LINE | 40    | 38    | 17   | 27   | 22   | 23    | 20   | 19    |
| L1ME3D_3end | L1 | LINE | 60    | 57    | 44   | 49   | 23   | 30    | 23   | 24    |
| L1ME_ORF2   | L1 | LINE | 368   | 358   | 225  | 235  | 188  | 204   | 121  | 176   |
| L1P4a_5end  | L1 | LINE | 81    | 94    | 56   | 52   | 31   | 17    | 18   | 39    |
| L1P4e_5end  | L1 | LINE | 15    | 13    | 14   | 9    | 12   | 9     | 16   | 8     |
| L1PA10      | L1 | LINE | 3443  | 3485  | 2195 | 2459 | 2245 | 2351  | 2015 | 2513  |
| L1PA11      | L1 | LINE | 1216  | 1164  | 725  | 841  | 767  | 856   | 766  | 885   |
| L1PA12      | L1 | LINE | 512   | 410   | 294  | 353  | 388  | 438   | 343  | 421   |
| L1PA12_5    | L1 | LINE | 116   | 110   | 82   | 75   | 69   | 50    | 69   | 86    |
| L1PA13      | L1 | LINE | 805   | 727   | 455  | 534  | 556  | 668   | 494  | 659   |
| L1PA13_5    | L1 | LINE | 131   | 110   | 76   | 91   | 75   | 64    | 66   | 75    |
| L1PA14      | L1 | LINE | 940   | 874   | 578  | 625  | 560  | 581   | 462  | 583   |
| L1PA14_5    | L1 | LINE | 21    | 17    | 16   | 13   | 9    | 9     | 12   | 14    |
| L1PA15      | L1 | LINE | 982   | 873   | 563  | 619  | 540  | 544   | 422  | 576   |
| L1PA16      | L1 | LINE | 891   | 890   | 528  | 594  | 535  | 509   | 359  | 535   |
| L1PA16_5    | L1 | LINE | 225   | 245   | 139  | 149  | 122  | 104   | 97   | 134   |
| L1PA2       | L1 | LINE | 4863  | 3546  | 2465 | 2927 | 2644 | 2745  | 2216 | 2815  |
| L1PA3       | L1 | LINE | 3538  | 4216  | 2416 | 3179 | 3353 | 4102  | 2720 | 3760  |
| L1PA4       | L1 | LINE | 3718  | 3690  | 2320 | 3003 | 3199 | 3881  | 3278 | 4144  |
| L1PA5       | L1 | LINE | 5483  | 5040  | 3182 | 4024 | 4341 | 5164  | 4500 | 5558  |
| L1PA6       | L1 | LINE | 12525 | 11385 | 6984 | 8595 | 8984 | 10393 | 8150 | 10180 |
| L1PA7       | L1 | LINE | 5684  | 4508  | 3036 | 3870 | 4667 | 5403  | 4550 | 5328  |
| L1PA7_5     | L1 | LINE | 3494  | 3645  | 2737 | 2994 | 2701 | 2619  | 2497 | 2790  |
| L1PA8       | L1 | LINE | 5191  | 4737  | 3196 | 3723 | 4159 | 4623  | 3735 | 4515  |
| L1PB1       | L1 | LINE | 1040  | 899   | 534  | 714  | 671  | 711   | 560  | 716   |
| L1PB2       | L1 | LINE | 881   | 787   | 461  | 585  | 523  | 559   | 419  | 529   |
| L1PB2c      | L1 | LINE | 3659  | 3243  | 1986 | 2494 | 2337 | 2236  | 1862 | 2366  |
| L1PB3       | L1 | LINE | 287   | 277   | 171  | 193  | 162  | 152   | 110  | 170   |
| L1PB4       | L1 | LINE | 652   | 580   | 342  | 386  | 328  | 280   | 211  | 371   |

|                 |               |      |        |       |       |       |       |       |        |        |
|-----------------|---------------|------|--------|-------|-------|-------|-------|-------|--------|--------|
| L1PBA1_5        | L1            | LINE | 110    | 113   | 82    | 92    | 92    | 92    | 89     | 78     |
| L1PBA_5         | L1            | LINE | 331    | 374   | 224   | 257   | 206   | 193   | 183    | 223    |
| L1PREC1         | L1            | LINE | 26205  | 24952 | 16025 | 17953 | 15758 | 15405 | 11667  | 14767  |
| L1PREC2         | L1            | LINE | 8633   | 8353  | 5012  | 5631  | 4685  | 4146  | 3316   | 4509   |
| L1P_MA2         | L1            | LINE | 619    | 609   | 336   | 429   | 378   | 349   | 283    | 361    |
| MER25           | L1            | LINE | 69     | 69    | 31    | 52    | 36    | 37    | 40     | 37     |
| TRNA_GLY        | tRNA          | tRNA | 5      | 9     | 15    | 8     | 14    | 30    | 9      | 41     |
| tRNA-Asp-GAY    | tRNA          | tRNA | 1      | 8     | 7     | 4     | 8     | 20    | 6      | 50     |
| tRNA-Leu-TTA(m) | tRNA          | tRNA | 59     | 41    | 47    | 28    | 26    | 30    | 19     | 29     |
| AluJb           | SINE1/7<br>SL | SINE | 37370  | 35015 | 31530 | 33487 | 31882 | 33592 | 39333  | 42049  |
| AluJr           | SINE1/7<br>SL | SINE | 349    | 306   | 288   | 290   | 348   | 319   | 364    | 433    |
| AluJr4          | SINE1/7<br>SL | SINE | 12428  | 11135 | 10026 | 10613 | 11171 | 11620 | 16897  | 18430  |
| AluSc           | SINE1/7<br>SL | SINE | 49882  | 40168 | 37244 | 40535 | 36641 | 39165 | 50035  | 53337  |
| AluSc5          | SINE1/7<br>SL | SINE | 68064  | 55257 | 51842 | 54006 | 56810 | 60607 | 69123  | 73023  |
| AluSc8          | SINE1/7<br>SL | SINE | 8166   | 8198  | 7540  | 7818  | 7545  | 8379  | 10551  | 11691  |
| AluSg1          | SINE1/7<br>SL | SINE | 7853   | 5886  | 5738  | 5720  | 6054  | 6072  | 8086   | 8726   |
| AluSg4          | SINE1/7<br>SL | SINE | 19389  | 15531 | 14940 | 15786 | 14313 | 14857 | 20454  | 21912  |
| AluSg7          | SINE1/7<br>SL | SINE | 31647  | 25912 | 23664 | 24941 | 25571 | 26238 | 30484  | 32388  |
| AluSp           | SINE1/7<br>SL | SINE | 102095 | 85261 | 79720 | 83689 | 84566 | 88586 | 101491 | 106704 |
| AluSq           | SINE1/7<br>SL | SINE | 10500  | 8997  | 8222  | 8194  | 7540  | 7697  | 8370   | 8792   |
| AluSq10         | SINE1/7<br>SL | SINE | 51048  | 46047 | 41461 | 43014 | 41827 | 43667 | 49329  | 52379  |
| AluSq2          | SINE1/7<br>SL | SINE | 41907  | 36209 | 35422 | 37566 | 36881 | 38416 | 47081  | 49471  |
| AluSq4          | SINE1/7<br>SL | SINE | 20481  | 15088 | 14763 | 14883 | 15512 | 16499 | 19541  | 20712  |
| AluSx3          | SINE1/7<br>SL | SINE | 2558   | 2362  | 1949  | 2291  | 2443  | 2746  | 2881   | 3210   |
| AluSx4          | SINE1/7<br>SL | SINE | 70994  | 58508 | 52040 | 54177 | 56938 | 60113 | 67036  | 71720  |
| AluSz           | SINE1/7<br>SL | SINE | 20450  | 17834 | 16159 | 16372 | 14741 | 15207 | 16634  | 17632  |
| AluSz6          | SINE1/7<br>SL | SINE | 92979  | 85791 | 81610 | 84793 | 80695 | 86949 | 93067  | 101578 |
| AluYa8          | SINE1/7<br>SL | SINE | 16251  | 13842 | 12032 | 13096 | 14147 | 15388 | 20955  | 23346  |
| AluYb3a1        | SINE1/7<br>SL | SINE | 82275  | 70725 | 69428 | 74928 | 67537 | 72539 | 91295  | 97607  |
| AluYb3a2        | SINE1/7<br>SL | SINE | 37005  | 27260 | 27405 | 30344 | 30705 | 33482 | 45931  | 48928  |
| AluYb9          | SINE1/7<br>SL | SINE | 40710  | 33328 | 30518 | 32340 | 36003 | 38716 | 52921  | 58377  |
| AluYbc3a        | SINE1/7<br>SL | SINE | 34153  | 27565 | 27566 | 30720 | 29485 | 31557 | 46861  | 49421  |
| AluYc2          | SINE1/7<br>SL | SINE | 4705   | 4082  | 3905  | 4060  | 4044  | 4337  | 5284   | 5605   |
| AluYc5          | SINE1/7<br>SL | SINE | 14307  | 17402 | 17846 | 19855 | 16189 | 18165 | 19518  | 21727  |
| AluYd3a1        | SINE1/7<br>SL | SINE | 3822   | 3169  | 2899  | 3131  | 3549  | 3755  | 5731   | 6180   |
| AluYd8          | SINE1/7<br>SL | SINE | 1731   | 2292  | 2322  | 2546  | 2012  | 2321  | 2485   | 2746   |
| AluYe5          | SINE1/7<br>SL | SINE | 2275   | 1680  | 1631  | 1800  | 1533  | 1634  | 3207   | 3660   |

|           |                              |      |        |        |        |        |        |        |        |        |
|-----------|------------------------------|------|--------|--------|--------|--------|--------|--------|--------|--------|
| AluYf2    | SINE1/7<br>SL                | SINE | 3154   | 2748   | 2681   | 2848   | 2676   | 2923   | 3954   | 4157   |
| AluYf5    | SINE1/7<br>SL                | SINE | 2401   | 2237   | 2185   | 2357   | 2023   | 2306   | 3698   | 4065   |
| AluYg6    | SINE1/7<br>SL                | SINE | 154723 | 127961 | 124036 | 133065 | 129375 | 138563 | 190408 | 203946 |
| AluYh9    | SINE1/7<br>SL                | SINE | 144314 | 123740 | 116121 | 124575 | 118276 | 128039 | 161385 | 173691 |
| AluYi6    | SINE1/7<br>SL                | SINE | 40214  | 35676  | 35120  | 37368  | 37347  | 40341  | 52024  | 55115  |
| AluYk11   | SINE1/7<br>SL                | SINE | 182942 | 141822 | 133007 | 144951 | 150296 | 161402 | 208996 | 223940 |
| AluYk12   | SINE1/7<br>SL                | SINE | 45652  | 36605  | 34766  | 36397  | 39900  | 43420  | 57166  | 62119  |
| AluYk13   | SINE1/7<br>SL                | SINE | 136854 | 105316 | 99718  | 107422 | 115641 | 123254 | 167127 | 179753 |
| FAM       | SINE1/7<br>SL                | SINE | 124    | 95     | 93     | 104    | 94     | 77     | 92     | 136    |
| FLAM      | SINE1/7<br>SL                | SINE | 1232   | 946    | 899    | 875    | 799    | 777    | 833    | 917    |
| FRAM      | SINE1/7<br>SL                | SINE | 16354  | 20012  | 20805  | 22202  | 18664  | 21145  | 21443  | 24119  |
| PB1D11    | SINE1/7<br>SL                | SINE | 15875  | 15365  | 12907  | 13199  | 13987  | 14653  | 16987  | 18744  |
| CHARLIE3  | hAT                          | DNA  | 82     | 73     | 72     | 71     | 47     | 45     | 48     | 50     |
| Charlie12 | hAT                          | DNA  | 103    | 91     | 66     | 81     | 70     | 71     | 53     | 65     |
| MER107    | hAT                          | DNA  | 17     | 10     | 9      | 6      | 9      | 9      | 10     | 5      |
| MER1A     | hAT                          | DNA  | 76     | 64     | 49     | 38     | 34     | 43     | 28     | 47     |
| MER1B     | hAT                          | DNA  | 457    | 420    | 317    | 391    | 329    | 342    | 330    | 332    |
| MER20     | hAT                          | DNA  | 45     | 52     | 28     | 43     | 32     | 28     | 42     | 35     |
| MER30     | hAT                          | DNA  | 60     | 49     | 31     | 38     | 23     | 28     | 25     | 39     |
| MER30B    | hAT                          | DNA  | 27     | 27     | 17     | 31     | 16     | 16     | 15     | 19     |
| MER75     | DNATrans<br>poson            | DNA  | 46     | 39     | 35     | 35     | 33     | 24     | 23     | 22     |
| MER82     | DNATrans<br>poson            | DNA  | 16     | 10     | 6      | 11     | 8      | 6      | 7      | 11     |
| MER85     | DNATrans<br>poson            | DNA  | 20     | 23     | 22     | 17     | 9      | 12     | 13     | 15     |
| GOLEM     | Mariner/T<br>c1              | DNA  | 17     | 9      | 8      | 12     | 9      | 4      | 9      | 10     |
| GOLEM_B   | Mariner/T<br>c1              | DNA  | 29     | 24     | 19     | 20     | 23     | 23     | 16     | 33     |
| GOLEM_C   | Mariner/T<br>c1              | DNA  | 19     | 14     | 12     | 13     | 18     | 18     | 8      | 16     |
| HSMAR1    | Mariner/T<br>c1              | DNA  | 507    | 394    | 290    | 341    | 317    | 363    | 269    | 352    |
| HSMAR2    | Mariner/T<br>c1              | DNA  | 80     | 74     | 45     | 54     | 47     | 34     | 27     | 41     |
| MADE1     | Mariner/T<br>c1              | DNA  | 19     | 19     | 14     | 22     | 8      | 7      | 7      | 10     |
| MER2      | Mariner/T<br>c1              | DNA  | 27     | 33     | 14     | 22     | 13     | 12     | 15     | 13     |
| TIGGER1   | Mariner/T<br>c1              | DNA  | 653    | 611    | 407    | 455    | 400    | 370    | 268    | 398    |
| TIGGER2   | Mariner/T<br>c1              | DNA  | 150    | 106    | 50     | 82     | 86     | 101    | 115    | 137    |
| TIGGER5   | Mariner/T<br>c1              | DNA  | 26     | 22     | 22     | 18     | 25     | 13     | 9      | 20     |
| ZOMBI     | Mariner/T<br>c1              | DNA  | 50     | 67     | 26     | 32     | 28     | 27     | 24     | 17     |
| ZOMBI_B   | Mariner/T<br>c1              | DNA  | 16     | 9      | 14     | 14     | 7      | 6      | 6      | 7      |
| HERV15I   | Endogen<br>ousRetro<br>virus | LTR  | 90     | 63     | 62     | 68     | 68     | 61     | 57     | 66     |

|           |                      |     |       |       |       |       |       |       |       |       |
|-----------|----------------------|-----|-------|-------|-------|-------|-------|-------|-------|-------|
| HERV18    | EndogenousRetrovirus | LTR | 98    | 113   | 75    | 75    | 65    | 77    | 65    | 84    |
| HERV1_LTR | EndogenousRetrovirus | LTR | 18    | 12    | 8     | 14    | 9     | 8     | 8     | 15    |
| HERV30I   | EndogenousRetrovirus | LTR | 148   | 166   | 109   | 121   | 85    | 83    | 92    | 88    |
| HERV39    | EndogenousRetrovirus | LTR | 24340 | 20117 | 15014 | 19940 | 25540 | 23284 | 33181 | 32721 |
| HERV46I   | EndogenousRetrovirus | LTR | 51    | 61    | 59    | 71    | 47    | 34    | 42    | 40    |
| HERV19I   | EndogenousRetrovirus | LTR | 109   | 101   | 84    | 102   | 105   | 95    | 87    | 75    |
| HERV21I   | EndogenousRetrovirus | LTR | 1424  | 1205  | 1204  | 1472  | 813   | 1127  | 2275  | 2398  |
| HERV48I   | EndogenousRetrovirus | LTR | 921   | 797   | 834   | 870   | 738   | 708   | 814   | 811   |
| HERV71A_I | EndogenousRetrovirus | LTR | 85    | 83    | 63    | 65    | 55    | 44    | 43    | 67    |
| HUERS-P2  | EndogenousRetrovirus | LTR | 26    | 24    | 16    | 20    | 9     | 17    | 17    | 17    |
| HUERS-P3B | EndogenousRetrovirus | LTR | 40    | 53    | 44    | 42    | 27    | 22    | 18    | 18    |
| MER31     | EndogenousRetrovirus | LTR | 11    | 13    | 10    | 14    | 9     | 11    | 10    | 8     |
| MER41I    | EndogenousRetrovirus | LTR | 15    | 18    | 14    | 16    | 9     | 6     | 6     | 10    |
| MER4BI    | EndogenousRetrovirus | LTR | 32    | 26    | 25    | 15    | 14    | 14    | 12    | 13    |
| MER57A_I  | EndogenousRetrovirus | LTR | 37    | 40    | 26    | 30    | 14    | 16    | 27    | 25    |
| MER57I    | EndogenousRetrovirus | LTR | 89    | 78    | 51    | 60    | 47    | 44    | 43    | 72    |
| MER61A    | EndogenousRetrovirus | LTR | 25    | 22    | 15    | 10    | 17    | 15    | 11    | 14    |
| MER84I    | EndogenousRetrovirus | LTR | 15    | 20    | 12    | 14    | 13    | 13    | 19    | 16    |
| PRIMA41   | EndogenousRetrovirus | LTR | 78    | 80    | 66    | 75    | 65    | 42    | 36    | 38    |
| PRIMA4_I  | EndogenousRetrovirus | LTR | 57400 | 47487 | 36033 | 47054 | 61179 | 55143 | 79059 | 77543 |
| MER22     | MER22                | LTR | 14468 | 17655 | 30314 | 22479 | 12549 | 12734 | 21133 | 13013 |
| ERVL      | ERV3                 | LTR | 184   | 191   | 97    | 122   | 117   | 109   | 76    | 112   |
| ERVL-B4   | ERV3                 | LTR | 289   | 258   | 165   | 185   | 162   | 175   | 174   | 185   |
| ERVL-E    | ERV3                 | LTR | 70    | 74    | 53    | 53    | 49    | 34    | 35    | 43    |
| HERVL     | ERV3                 | LTR | 2186  | 1937  | 1210  | 1315  | 1213  | 1135  | 1023  | 1259  |
| HERVL66I  | ERV3                 | LTR | 64    | 46    | 41    | 59    | 33    | 40    | 34    | 46    |
| LTR18A    | ERV3                 | LTR | 41    | 44    | 42    | 51    | 41    | 40    | 31    | 36    |

|              |                  |            |       |      |      |      |      |      |       |       |
|--------------|------------------|------------|-------|------|------|------|------|------|-------|-------|
| LTR18B       | ERV3             | LTR        | 49    | 33   | 34   | 37   | 28   | 32   | 27    | 27    |
| LTR18C       | ERV3             | LTR        | 19    | 29   | 22   | 17   | 22   | 19   | 23    | 21    |
| LTR19A       | ERV3             | LTR        | 28    | 41   | 23   | 22   | 19   | 18   | 15    | 25    |
| LTR32        | ERV3             | LTR        | 27    | 26   | 18   | 19   | 20   | 22   | 14    | 24    |
| LTR66        | ERV3             | LTR        | 67    | 61   | 48   | 46   | 37   | 54   | 32    | 49    |
| LTR7A        | ERV3             | LTR        | 1282  | 1221 | 911  | 1045 | 767  | 718  | 907   | 990   |
| LTR7B        | ERV3             | LTR        | 1173  | 1111 | 901  | 980  | 766  | 692  | 666   | 777   |
| LTR7C        | ERV3             | LTR        | 228   | 267  | 184  | 205  | 155  | 163  | 196   | 174   |
| LTR7Y        | ERV3             | LTR        | 1894  | 1648 | 1362 | 1547 | 1196 | 1106 | 1383  | 1475  |
| MER21A       | ERV3             | LTR        | 29    | 26   | 22   | 19   | 20   | 15   | 16    | 28    |
| MER21B       | ERV3             | LTR        | 19    | 22   | 12   | 18   | 13   | 14   | 18    | 19    |
| MER21C       | ERV3             | LTR        | 16    | 12   | 8    | 10   | 7    | 7    | 5     | 3     |
| MLT1A0       | ERV3             | LTR        | 27    | 40   | 18   | 16   | 13   | 14   | 13    | 24    |
| MLT1B        | ERV3             | LTR        | 107   | 91   | 65   | 81   | 66   | 60   | 42    | 61    |
| MLT1C        | ERV3             | LTR        | 48    | 57   | 39   | 42   | 33   | 25   | 33    | 49    |
| MLT1C1       | ERV3             | LTR        | 25    | 31   | 14   | 15   | 10   | 12   | 18    | 13    |
| MLT1D        | ERV3             | LTR        | 37    | 35   | 27   | 26   | 27   | 17   | 22    | 28    |
| MLT2A1       | ERV3             | LTR        | 530   | 482  | 259  | 331  | 312  | 306  | 277   | 345   |
| MLT2A2       | ERV3             | LTR        | 817   | 774  | 429  | 482  | 479  | 451  | 393   | 517   |
| MLT2B2       | ERV3             | LTR        | 23    | 20   | 12   | 16   | 9    | 8    | 6     | 10    |
| MSTA         | ERV3             | LTR        | 609   | 632  | 409  | 475  | 362  | 351  | 317   | 425   |
| MSTA1        | ERV3             | LTR        | 25    | 28   | 10   | 22   | 15   | 16   | 11    | 14    |
| MSTA2        | ERV3             | LTR        | 44    | 43   | 43   | 33   | 28   | 21   | 21    | 21    |
| MSTB         | ERV3             | LTR        | 188   | 213  | 163  | 158  | 115  | 113  | 118   | 149   |
| MSTB1        | ERV3             | LTR        | 95    | 105  | 65   | 77   | 78   | 47   | 61    | 68    |
| MSTC         | ERV3             | LTR        | 41    | 51   | 35   | 38   | 28   | 18   | 24    | 29    |
| MSTD         | ERV3             | LTR        | 27    | 27   | 13   | 14   | 12   | 9    | 11    | 10    |
| MST_I        | ERV3             | LTR        | 629   | 562  | 354  | 427  | 311  | 401  | 276   | 405   |
| THE1A        | ERV3             | LTR        | 1047  | 912  | 692  | 735  | 605  | 648  | 486   | 674   |
| THE1B        | ERV3             | LTR        | 1173  | 1196 | 778  | 858  | 691  | 616  | 579   | 700   |
| THE1C        | ERV3             | LTR        | 638   | 632  | 386  | 395  | 368  | 333  | 302   | 402   |
| THE1D        | ERV3             | LTR        | 517   | 558  | 334  | 344  | 262  | 242  | 194   | 286   |
| L2           | CR1              | LINE       | 15    | 16   | 14   | 15   | 18   | 14   | 10    | 23    |
| 7SK          | Pseudogene       | Pseudogene | 26    | 17   | 19   | 23   | 25   | 22   | 28    | 19    |
| 7SL          | Pseudogene       | Pseudogene | 10023 | 9262 | 8440 | 8478 | 9026 | 8980 | 12982 | 14256 |
| CYCLO        | Pseudogene       | Pseudogene | 140   | 134  | 77   | 110  | 107  | 110  | 95    | 128   |
| L23          | Pseudogene       | Pseudogene | 97    | 103  | 95   | 84   | 101  | 77   | 78    | 80    |
| L23A         | Pseudogene       | Pseudogene | 78    | 53   | 44   | 68   | 46   | 57   | 44    | 65    |
| L28          | Pseudogene       | Pseudogene | 40    | 37   | 40   | 54   | 43   | 49   | 47    | 71    |
| L31          | Pseudogene       | Pseudogene | 63    | 32   | 36   | 44   | 42   | 52   | 40    | 50    |
| L37          | Pseudogene       | Pseudogene | 19    | 29   | 14   | 19   | 24   | 20   | 15    | 23    |
| L7           | Pseudogene       | Pseudogene | 59    | 51   | 31   | 41   | 43   | 37   | 25    | 26    |
| L7A          | Pseudogene       | Pseudogene | 164   | 195  | 169  | 178  | 151  | 163  | 162   | 152   |
| RICKSHA      | MuDR             | DNA        | 15    | 15   | 12   | 16   | 6    | 7    | 10    | 9     |
| HARLEQUINLTR | LTRRetrotranspos | LTR        | 1355  | 1099 | 892  | 1101 | 1003 | 1070 | 1210  | 1204  |

|              |                            |               |       |       |       |       |      |       |      |       |
|--------------|----------------------------|---------------|-------|-------|-------|-------|------|-------|------|-------|
|              | on                         |               |       |       |       |       |      |       |      |       |
| HERV-K14CI   | LTRRetro<br>transpos<br>on | LTR           | 79    | 81    | 57    | 64    | 57   | 38    | 36   | 44    |
| HERV-K14I    | LTRRetro<br>transpos<br>on | LTR           | 215   | 214   | 171   | 167   | 184  | 162   | 152  | 136   |
| HUERS-P3     | LTRRetro<br>transpos<br>on | LTR           | 48    | 53    | 31    | 39    | 34   | 22    | 18   | 26    |
| LOR1         | LTRRetro<br>transpos<br>on | LTR           | 11    | 11    | 12    | 13    | 5    | 8     | 11   | 4     |
| MER4I        | LTRRetro<br>transpos<br>on | LTR           | 65    | 62    | 43    | 42    | 45   | 60    | 43   | 61    |
| MER51I       | LTRRetro<br>transpos<br>on | LTR           | 26    | 25    | 12    | 12    | 14   | 11    | 12   | 15    |
| MER52B       | LTRRetro<br>transpos<br>on | LTR           | 108   | 110   | 75    | 102   | 85   | 101   | 100  | 98    |
| MER61D       | LTRRetro<br>transpos<br>on | LTR           | 24    | 14    | 8     | 11    | 6    | 12    | 13   | 10    |
| MER61E       | LTRRetro<br>transpos<br>on | LTR           | 16    | 25    | 15    | 18    | 18   | 16    | 15   | 11    |
| MER61I       | LTRRetro<br>transpos<br>on | LTR           | 139   | 101   | 69    | 77    | 55   | 66    | 54   | 61    |
| PTR5         | LTRRetro<br>transpos<br>on | LTR           | 586   | 627   | 638   | 673   | 631  | 607   | 1056 | 1089  |
| THE1_I       | LTRRetro<br>transpos<br>on | LTR           | 2919  | 2823  | 1776  | 1923  | 1561 | 1615  | 1492 | 1817  |
| U1           | snRNA                      | snRNA         | 33    | 25    | 21    | 16    | 22   | 13    | 15   | 28    |
| U2           | snRNA                      | snRNA         | 25    | 42    | 24    | 28    | 23   | 28    | 31   | 18    |
| U6           | snRNA                      | snRNA         | 99    | 68    | 59    | 84    | 71   | 80    | 61   | 59    |
| 5S           | rRNA                       | rRNA          | 29    | 50    | 218   | 54    | 32   | 54    | 65   | 111   |
| LSU-rRNA_Cel | rRNA                       | rRNA          | 1593  | 1381  | 802   | 2089  | 66   | 1412  | 164  | 319   |
| LSU-rRNA_Dme | rRNA                       | rRNA          | 1577  | 1403  | 817   | 2063  | 46   | 1440  | 186  | 336   |
| LSU-rRNA_Hsa | rRNA                       | rRNA          | 31177 | 27713 | 17765 | 42565 | 1290 | 28059 | 6417 | 10913 |
| SSU-rRNA_Cel | rRNA                       | rRNA          | 1232  | 1173  | 733   | 1528  | 81   | 969   | 157  | 283   |
| SSU-rRNA_Dme | rRNA                       | rRNA          | 1658  | 1498  | 947   | 2028  | 101  | 1273  | 217  | 404   |
| SSU-rRNA_Hsa | rRNA                       | rRNA          | 13288 | 11085 | 7193  | 16585 | 867  | 10018 | 2065 | 3239  |
| R66          | R66                        | R66           | 106   | 67    | 42    | 61    | 35   | 39    | 36   | 45    |
| MSR1         | MSAT                       | Satellit<br>e | 17    | 34    | 23    | 22    | 20   | 8     | 27   | 29    |
| SVA2         | MSAT                       | Satellit<br>e | 43    | 40    | 43    | 33    | 27   | 30    | 39   | 54    |
| HARLEQUIN    | ERV1                       | LTR           | 739   | 696   | 516   | 570   | 500  | 551   | 479  | 575   |
| HERV-Fc1     | ERV1                       | LTR           | 323   | 370   | 379   | 387   | 274  | 287   | 356  | 318   |
| HERV-Fc2     | ERV1                       | LTR           | 175   | 225   | 224   | 244   | 213  | 160   | 203  | 193   |
| HERV17       | ERV1                       | LTR           | 1482  | 1346  | 1071  | 1193  | 981  | 965   | 895  | 1051  |
| HERV19I      | ERV1                       | LTR           | 49    | 51    | 38    | 47    | 32   | 33    | 26   | 34    |
| HERV1_I      | ERV1                       | LTR           | 77    | 70    | 53    | 84    | 62   | 54    | 58   | 58    |
| HERV1_LTRb   | ERV1                       | LTR           | 13    | 12    | 7     | 9     | 10   | 4     | 10   | 9     |
| HERV3        | ERV1                       | LTR           | 61    | 67    | 37    | 57    | 54   | 43    | 58   | 53    |
| HERV35I      | ERV1                       | LTR           | 23    | 18    | 12    | 18    | 9    | 17    | 7    | 5     |

|            |      |     |       |       |       |       |       |       |       |       |
|------------|------|-----|-------|-------|-------|-------|-------|-------|-------|-------|
| HERV4_I    | ERV1 | LTR | 32    | 42    | 32    | 17    | 25    | 23    | 19    | 18    |
| HERV9      | ERV1 | LTR | 847   | 992   | 688   | 722   | 545   | 499   | 498   | 535   |
| HERVE      | ERV1 | LTR | 1139  | 974   | 1042  | 970   | 861   | 795   | 846   | 922   |
| HERVE_a    | ERV1 | LTR | 1105  | 987   | 903   | 939   | 797   | 770   | 813   | 917   |
| HERVH      | ERV1 | LTR | 10971 | 10303 | 9135  | 9770  | 9366  | 8767  | 9701  | 9994  |
| HERVI      | ERV1 | LTR | 72    | 57    | 40    | 48    | 45    | 49    | 53    | 77    |
| HERVIP10F  | ERV1 | LTR | 385   | 366   | 314   | 306   | 293   | 254   | 257   | 300   |
| HERVIP10FH | ERV1 | LTR | 1440  | 1239  | 1166  | 1505  | 820   | 1139  | 2115  | 2410  |
| HERVS71    | ERV1 | LTR | 276   | 307   | 303   | 330   | 250   | 234   | 294   | 275   |
| HUERS-P1   | ERV1 | LTR | 91    | 102   | 56    | 67    | 44    | 57    | 53    | 58    |
| LOR1I      | ERV1 | LTR | 36    | 24    | 14    | 19    | 13    | 14    | 13    | 19    |
| LOR1a_LTR  | ERV1 | LTR | 7     | 15    | 13    | 11    | 14    | 14    | 18    | 23    |
| LTR1       | ERV1 | LTR | 60    | 69    | 50    | 45    | 46    | 51    | 44    | 63    |
| LTR10A     | ERV1 | LTR | 126   | 137   | 116   | 134   | 104   | 112   | 128   | 145   |
| LTR10B     | ERV1 | LTR | 25    | 22    | 16    | 23    | 20    | 17    | 16    | 34    |
| LTR10C     | ERV1 | LTR | 122   | 141   | 95    | 79    | 72    | 58    | 66    | 91    |
| LTR10D     | ERV1 | LTR | 40    | 45    | 41    | 38    | 37    | 32    | 27    | 24    |
| LTR10E     | ERV1 | LTR | 27    | 34    | 23    | 16    | 15    | 17    | 12    | 19    |
| LTR10F     | ERV1 | LTR | 635   | 547   | 437   | 548   | 701   | 674   | 645   | 691   |
| LTR10G     | ERV1 | LTR | 58    | 69    | 57    | 52    | 64    | 65    | 57    | 57    |
| LTR12      | ERV1 | LTR | 1458  | 1243  | 1060  | 1164  | 858   | 948   | 858   | 915   |
| LTR12B     | ERV1 | LTR | 1295  | 1004  | 923   | 980   | 731   | 853   | 757   | 754   |
| LTR12C     | ERV1 | LTR | 16797 | 15601 | 14303 | 15832 | 13011 | 13272 | 18290 | 19132 |
| LTR12D     | ERV1 | LTR | 2883  | 2418  | 2134  | 2387  | 1862  | 1902  | 2808  | 2999  |
| LTR12E     | ERV1 | LTR | 8811  | 8750  | 7985  | 8903  | 7934  | 8090  | 13043 | 13068 |
| LTR12F     | ERV1 | LTR | 978   | 763   | 698   | 762   | 596   | 667   | 620   | 639   |
| LTR15      | ERV1 | LTR | 14    | 19    | 4     | 13    | 3     | 6     | 5     | 7     |
| LTR17      | ERV1 | LTR | 1862  | 1756  | 1346  | 1668  | 1581  | 1595  | 1678  | 1837  |
| LTR1A2     | ERV1 | LTR | 311   | 322   | 225   | 284   | 239   | 287   | 277   | 300   |
| LTR1B      | ERV1 | LTR | 91    | 77    | 49    | 64    | 66    | 59    | 61    | 67    |
| LTR1B0     | ERV1 | LTR | 56    | 58    | 48    | 78    | 52    | 55    | 47    | 69    |
| LTR1B1     | ERV1 | LTR | 85    | 80    | 50    | 75    | 70    | 66    | 62    | 73    |
| LTR1C      | ERV1 | LTR | 29    | 35    | 28    | 19    | 23    | 19    | 31    | 21    |
| LTR1C1     | ERV1 | LTR | 43    | 32    | 21    | 36    | 36    | 28    | 41    | 34    |
| LTR1C2     | ERV1 | LTR | 19    | 13    | 9     | 16    | 13    | 10    | 11    | 14    |
| LTR1C3     | ERV1 | LTR | 19    | 14    | 10    | 22    | 14    | 14    | 23    | 17    |
| LTR1D      | ERV1 | LTR | 72    | 53    | 31    | 41    | 29    | 42    | 42    | 51    |
| LTR1D1     | ERV1 | LTR | 60    | 39    | 37    | 33    | 33    | 33    | 36    | 39    |
| LTR1E      | ERV1 | LTR | 53    | 49    | 53    | 62    | 51    | 46    | 48    | 48    |
| LTR1F      | ERV1 | LTR | 49    | 47    | 33    | 47    | 44    | 38    | 35    | 50    |
| LTR1F1     | ERV1 | LTR | 35    | 24    | 17    | 24    | 12    | 16    | 18    | 25    |
| LTR1F2     | ERV1 | LTR | 53    | 44    | 36    | 62    | 44    | 41    | 43    | 55    |
| LTR25-int  | ERV1 | LTR | 23    | 16    | 7     | 10    | 8     | 1     | 7     | 11    |
| LTR26      | ERV1 | LTR | 20    | 12    | 15    | 12    | 8     | 5     | 9     | 6     |
| LTR26B     | ERV1 | LTR | 17    | 13    | 20    | 16    | 14    | 15    | 19    | 14    |
| LTR27      | ERV1 | LTR | 18    | 24    | 17    | 20    | 14    | 12    | 14    | 15    |
| LTR2752    | ERV1 | LTR | 56    | 55    | 35    | 51    | 38    | 47    | 66    | 58    |
| LTR28      | ERV1 | LTR | 39    | 30    | 22    | 22    | 23    | 17    | 27    | 26    |
| LTR28B     | ERV1 | LTR | 24    | 23    | 18    | 18    | 13    | 14    | 19    | 16    |
| LTR28C     | ERV1 | LTR | 27    | 41    | 19    | 22    | 30    | 21    | 19    | 29    |

|            |      |     |     |     |     |     |     |     |     |     |
|------------|------|-----|-----|-----|-----|-----|-----|-----|-----|-----|
| LTR2B      | ERV1 | LTR | 353 | 237 | 183 | 212 | 182 | 211 | 221 | 251 |
| LTR2C      | ERV1 | LTR | 50  | 58  | 41  | 52  | 46  | 38  | 38  | 46  |
| LTR30      | ERV1 | LTR | 48  | 39  | 27  | 42  | 26  | 20  | 24  | 27  |
| LTR35A     | ERV1 | LTR | 3   | 15  | 7   | 11  | 12  | 13  | 13  | 9   |
| LTR39      | ERV1 | LTR | 17  | 13  | 10  | 7   | 3   | 4   | 8   | 7   |
| LTR43      | ERV1 | LTR | 22  | 16  | 18  | 18  | 22  | 16  | 11  | 12  |
| LTR45B     | ERV1 | LTR | 18  | 18  | 7   | 17  | 7   | 11  | 8   | 6   |
| LTR46      | ERV1 | LTR | 23  | 12  | 9   | 11  | 16  | 12  | 15  | 15  |
| LTR49      | ERV1 | LTR | 25  | 33  | 12  | 15  | 20  | 15  | 14  | 21  |
| LTR6A      | ERV1 | LTR | 69  | 59  | 43  | 48  | 34  | 37  | 31  | 26  |
| LTR6B      | ERV1 | LTR | 127 | 118 | 108 | 100 | 78  | 53  | 75  | 71  |
| LTR71A     | ERV1 | LTR | 44  | 29  | 30  | 47  | 32  | 33  | 26  | 34  |
| LTR71B     | ERV1 | LTR | 63  | 59  | 58  | 40  | 40  | 41  | 39  | 35  |
| LTR76      | ERV1 | LTR | 15  | 22  | 13  | 13  | 15  | 13  | 14  | 11  |
| LTR8       | ERV1 | LTR | 261 | 238 | 199 | 213 | 171 | 155 | 158 | 176 |
| LTR8A      | ERV1 | LTR | 47  | 42  | 28  | 34  | 28  | 14  | 13  | 29  |
| LTR8B      | ERV1 | LTR | 34  | 27  | 20  | 14  | 24  | 11  | 23  | 28  |
| LTR9       | ERV1 | LTR | 145 | 108 | 100 | 97  | 97  | 98  | 83  | 96  |
| LTR9A1     | ERV1 | LTR | 54  | 45  | 37  | 41  | 37  | 37  | 36  | 32  |
| LTR9B      | ERV1 | LTR | 182 | 183 | 132 | 159 | 126 | 118 | 126 | 140 |
| LTR9D      | ERV1 | LTR | 37  | 35  | 28  | 28  | 27  | 19  | 15  | 30  |
| MER31A     | ERV1 | LTR | 16  | 19  | 13  | 20  | 11  | 20  | 9   | 9   |
| MER39      | ERV1 | LTR | 25  | 18  | 6   | 7   | 14  | 11  | 10  | 17  |
| MER39B     | ERV1 | LTR | 40  | 44  | 21  | 30  | 18  | 22  | 24  | 20  |
| MER41A     | ERV1 | LTR | 156 | 147 | 125 | 128 | 108 | 104 | 95  | 112 |
| MER41B     | ERV1 | LTR | 62  | 51  | 41  | 46  | 33  | 38  | 27  | 26  |
| MER41C     | ERV1 | LTR | 18  | 21  | 12  | 14  | 13  | 10  | 9   | 7   |
| MER41D     | ERV1 | LTR | 24  | 11  | 15  | 14  | 17  | 7   | 13  | 9   |
| MER41E     | ERV1 | LTR | 19  | 11  | 9   | 8   | 12  | 14  | 10  | 9   |
| MER48      | ERV1 | LTR | 82  | 93  | 80  | 109 | 101 | 98  | 90  | 106 |
| MER49      | ERV1 | LTR | 34  | 32  | 22  | 23  | 18  | 13  | 14  | 22  |
| MER4A      | ERV1 | LTR | 41  | 41  | 22  | 28  | 28  | 19  | 18  | 20  |
| MER4A1     | ERV1 | LTR | 264 | 234 | 186 | 221 | 144 | 138 | 112 | 148 |
| MER4A1_LTR | ERV1 | LTR | 129 | 119 | 100 | 108 | 70  | 70  | 74  | 72  |
| MER4B      | ERV1 | LTR | 34  | 20  | 12  | 17  | 8   | 11  | 6   | 11  |
| MER4C      | ERV1 | LTR | 36  | 31  | 21  | 19  | 10  | 14  | 18  | 20  |
| MER4D      | ERV1 | LTR | 26  | 38  | 19  | 24  | 22  | 14  | 13  | 9   |
| MER4D1     | ERV1 | LTR | 76  | 65  | 39  | 49  | 39  | 28  | 22  | 30  |
| MER4D_LTR  | ERV1 | LTR | 38  | 38  | 36  | 40  | 21  | 25  | 13  | 22  |
| MER4E      | ERV1 | LTR | 134 | 102 | 61  | 81  | 62  | 62  | 37  | 57  |
| MER4E1     | ERV1 | LTR | 138 | 91  | 61  | 84  | 51  | 69  | 41  | 68  |
| MER50      | ERV1 | LTR | 55  | 45  | 37  | 49  | 44  | 36  | 27  | 43  |
| MER50B     | ERV1 | LTR | 24  | 25  | 25  | 30  | 22  | 20  | 18  | 27  |
| MER50C     | ERV1 | LTR | 16  | 18  | 13  | 16  | 18  | 8   | 11  | 25  |
| MER50I     | ERV1 | LTR | 37  | 47  | 26  | 33  | 32  | 24  | 21  | 29  |
| MER51A     | ERV1 | LTR | 77  | 64  | 39  | 56  | 39  | 49  | 40  | 50  |
| MER51B     | ERV1 | LTR | 87  | 71  | 48  | 47  | 36  | 49  | 43  | 41  |
| MER51C     | ERV1 | LTR | 22  | 20  | 21  | 19  | 21  | 14  | 16  | 13  |
| MER51E     | ERV1 | LTR | 16  | 15  | 10  | 7   | 9   | 14  | 6   | 15  |
| MER52A     | ERV1 | LTR | 124 | 102 | 80  | 82  | 72  | 88  | 89  | 111 |

|            |           |           |         |         |         |         |         |         |         |         |
|------------|-----------|-----------|---------|---------|---------|---------|---------|---------|---------|---------|
| MER52AI    | ERV1      | LTR       | 35      | 48      | 27      | 19      | 20      | 16      | 15      | 21      |
| MER52C     | ERV1      | LTR       | 67      | 80      | 55      | 60      | 53      | 48      | 61      | 80      |
| MER52D     | ERV1      | LTR       | 86      | 100     | 58      | 84      | 72      | 82      | 106     | 118     |
| MER57A1    | ERV1      | LTR       | 88      | 88      | 60      | 79      | 66      | 63      | 48      | 61      |
| MER57B1    | ERV1      | LTR       | 55      | 44      | 44      | 54      | 41      | 44      | 44      | 38      |
| MER57B2    | ERV1      | LTR       | 16      | 12      | 13      | 14      | 11      | 20      | 11      | 14      |
| MER61C     | ERV1      | LTR       | 13      | 14      | 8       | 13      | 8       | 4       | 6       | 10      |
| MER66C     | ERV1      | LTR       | 37      | 42      | 22      | 23      | 23      | 16      | 22      | 26      |
| MER66_I    | ERV1      | LTR       | 14      | 14      | 7       | 6       | 10      | 9       | 5       | 12      |
| MER83      | ERV1      | LTR       | 20      | 29      | 16      | 18      | 22      | 11      | 12      | 21      |
| MER83C     | ERV1      | LTR       | 16      | 10      | 8       | 10      | 14      | 14      | 9       | 13      |
| PABL_A     | ERV1      | LTR       | 44      | 52      | 45      | 46      | 33      | 31      | 31      | 35      |
| PABL_AI    | ERV1      | LTR       | 45      | 26      | 22      | 35      | 22      | 25      | 25      | 35      |
| PABL_B     | ERV1      | LTR       | 19      | 20      | 14      | 19      | 15      | 11      | 15      | 11      |
| PRIMA4_LTR | ERV1      | LTR       | 34      | 26      | 20      | 27      | 18      | 12      | 13      | 16      |
| MER122     | MER122    | MER122    | 24      | 37      | 33      | 38      | 31      | 29      | 40      | 32      |
| MIR        | SINE      | SINE      | 24      | 16      | 10      | 9       | 8       | 7       | 3       | 5       |
| SVA        | SINE      | SINE      | 64185   | 64538   | 63583   | 66819   | 59089   | 60622   | 104990  | 104893  |
| ACRO1      | SAT       | Satellite | 3028    | 4172    | 3750    | 3847    | 2181    | 2850    | 3560    | 2767    |
| ALR        | SAT       | Satellite | 4498    | 5036    | 5060    | 5239    | 1752    | 1341    | 1265    | 1511    |
| ALR1       | SAT       | Satellite | 8731    | 8045    | 8053    | 7146    | 3224    | 2429    | 2119    | 2786    |
| ALR2       | SAT       | Satellite | 49      | 71      | 54      | 39      | 25      | 17      | 18      | 22      |
| ALR_       | SAT       | Satellite | 3973    | 5132    | 4210    | 4188    | 2029    | 1494    | 1002    | 1179    |
| ALRa_      | SAT       | Satellite | 17      | 31      | 19      | 17      | 8       | 8       | 6       | 7       |
| ALRb       | SAT       | Satellite | 5316    | 6230    | 6021    | 5915    | 2518    | 1978    | 1555    | 1645    |
| BSR        | SAT       | Satellite | 582     | 876     | 842     | 838     | 540     | 317     | 346     | 422     |
| CER        | SAT       | Satellite | 104     | 168     | 100     | 123     | 86      | 66      | 55      | 74      |
| D20S16     | SAT       | Satellite | 30      | 52      | 35      | 32      | 23      | 40      | 36      | 30      |
| GSAT       | SAT       | Satellite | 109     | 139     | 151     | 146     | 103     | 96      | 154     | 127     |
| GSATII     | SAT       | Satellite | 183     | 189     | 227     | 193     | 125     | 126     | 250     | 199     |
| GSATX      | SAT       | Satellite | 28      | 45      | 40      | 43      | 25      | 29      | 37      | 43      |
| HSAT5      | SAT       | Satellite | 6       | 9       | 10      | 15      | 12      | 6       | 8       | 3       |
| HSATI      | SAT       | Satellite | 364     | 77      | 57      | 47      | 9       | 12      | 14      | 15      |
| LSAU       | SAT       | Satellite | 476     | 690     | 884     | 957     | 542     | 427     | 788     | 730     |
| REP522     | Satellite | Satellite | 46      | 51      | 36      | 52      | 43      | 31      | 67      | 66      |
| TAR1       | Satellite | Satellite | 1069    | 803     | 778     | 736     | 914     | 694     | 1749    | 1373    |
| Hg18       | Hg18      | Hg18      | 6170830 | 6378017 | 6451329 | 6248898 | 6124398 | 5500468 | 6987639 | 6865064 |
