# Supplementary material for: The landscape of DNA repeat elements in human heart failure
Source: PubMed Central journal article supplement (PMC3491418; doi:10.1186/gb-2012-13-10-r90), 2012-10-03
Supplement: gb-2012-13-10-r90-S10.pdf [file gb-2012-13-10-r90-S10.pdf]

| <b>Id</b> | <b>Repeat</b> | <b>Chr</b>   | <b>Strand</b> | <b>Start</b> | <b>End</b> | <b>Gene Symbol (5prime 5000bp upstream)</b> |
|-----------|---------------|--------------|---------------|--------------|------------|---------------------------------------------|
| 39        | ALR           | chr3         | -             | 90548062     | 90548093   |                                             |
| 40        | ALR           | chr3         | -             | 90489240     | 90489271   |                                             |
| 28        | ALR           | chr4         | -             | 67947143     | 67947579   |                                             |
| 27        | ALR           | chr7         | +             | 61613934     | 61614039   |                                             |
| 32        | ALR           | chr7         | +             | 61612596     | 61612674   |                                             |
| 20        | ALR           | chr7         | +             | 61607485     | 61607597   |                                             |
| 14        | ALR           | chr7         | +             | 61605783     | 61643936   |                                             |
| 22        | ALR           | chr7         | +             | 61613594     | 61613706   |                                             |
| 30        | ALR           | chr7         | +             | 61611236     | 61611331   |                                             |
| 16        | ALR           | chr7         | +             | 61606463     | 61612409   |                                             |
| 19        | ALR           | chr7         | +             | 61605274     | 61605386   |                                             |
| 29        | ALR           | chr7         | +             | 61611916     | 61612011   |                                             |
| 31        | ALR           | chr7         | +             | 61611407     | 61611671   |                                             |
| 5         | ALR           | chr7         | +             | 61604594     | 61617838   |                                             |
| 42        | ALR           | chr9         | +             | 66551599     | 66551628   |                                             |
| 35        | ALR           | chr19        | +             | 32429339     | 32429382   |                                             |
| 11        | ALR           | chr19        | +             | 32430358     | 32430528   |                                             |
| 3         | ALR           | chr19        | +             | 32423912     | 32424082   |                                             |
| 7         | ALR           | chr19        | +             | 32429000     | 32429508   |                                             |
| 9         | ALR           | chr19        | +             | 32425940     | 32426110   |                                             |
| 2         | ALR           | chr19        | +             | 32424252     | 32425771   |                                             |
| 15        | ALR           | chr19        | +             | 32428320     | 32428470   |                                             |
| 38        | ALR           | chr19        | -             | 32596387     | 32596421   |                                             |
| 8         | ALR           | chr19        | +             | 32432054     | 32432927   |                                             |
| 4         | ALR           | chr19        | +             | 32430698     | 32431884   |                                             |
| 18        | ALR           | chr19        | +             | 32425269     | 32426790   |                                             |
| 37        | ALR           | chr19        | -             | 32590023     | 32590062   |                                             |
| 10        | ALR           | chr19        | +             | 32431038     | 32431208   |                                             |
| 1         | ALR           | chr1         | +             | 121185594    | 121185932  |                                             |
| 0         | ALR           | chr1         | +             | 121186613    | 121186783  |                                             |
| 34        | ALR           | chr11        | -             | 50637083     | 50713081   |                                             |
| 41        | ALR           | chr11        | +             | 48786990     | 48787021   |                                             |
| 36        | ALR           | chr19_random | -             | 51538        | 51587      |                                             |
| 25        | ALR           | chr10        | -             | 41857748     | 41861256   |                                             |
| 6         | ALR           | chr10        | +             | 41720099     | 41720269   |                                             |
| 21        | ALR           | chr10        | -             | 41849262     | 41849374   |                                             |
| 26        | ALR           | chr10        | -             | 41856051     | 41858706   |                                             |
| 17        | ALR           | chr10        | +             | 41718575     | 41718744   |                                             |
| 12        | ALR           | chr10        | +             | 41719253     | 41719423   |                                             |
| 24        | ALR           | chr10        | +             | 41722303     | 41722413   |                                             |
| 13        | ALR           | chr10        | -             | 41858369     | 41864994   |                                             |
| 23        | ALR           | chr10        | +             | 41718914     | 41719026   |                                             |
| 33        | ALR           | chr16        | -             | 33899311     | 33899626   |                                             |
| 274       | ALRb          | chr7         | +             | 61604680     | 61605868   |                                             |
| 330       | ALRb          | chr7         | +             | 57961948     | 57982951   |                                             |
| 307       | ALRb          | chr7         | +             | 61604594     | 61604679   |                                             |

|     |      |              |   |           |           |           |
|-----|------|--------------|---|-----------|-----------|-----------|
| 295 | ALRb | chr7         | + | 61613680  | 61613806  |           |
| 287 | ALRb | chr7         | + | 61607231  | 61607570  |           |
| 336 | ALRb | chr7         | + | 61609948  | 61609978  |           |
| 277 | ALRb | chr7         | + | 61605869  | 61607910  |           |
| 329 | ALRb | chr7         | + | 61605913  | 61613679  |           |
| 275 | ALRb | chr7         | + | 61606549  | 61606889  |           |
| 284 | ALRb | chr7         | + | 61607571  | 61610286  |           |
| 301 | ALRb | chr7         | + | 61605026  | 61605359  |           |
| 322 | ALRb | chr20        | + | 26212769  | 26213061  |           |
| 303 | ALRb | chr14        | - | 18105583  | 18105686  |           |
| 296 | ALRb | chr8         | + | 43892926  | 43893579  |           |
| 315 | ALRb | chr19        | + | 32428320  | 32429934  |           |
| 276 | ALRb | chr19        | + | 32423998  | 32425004  |           |
| 320 | ALRb | chr19        | + | 32430784  | 32430865  |           |
| 309 | ALRb | chr19        | + | 32424252  | 32428065  |           |
| 278 | ALRb | chr19        | + | 32428066  | 32437643  |           |
| 266 | ALRb | chr19        | + | 32429764  | 32430778  |           |
| 331 | ALRb | chr19        | + | 32430018  | 32430056  |           |
| 271 | ALRb | chr1         | + | 121186020 | 121186359 |           |
| 321 | ALRb | chr1         | + | 121186699 | 121186768 |           |
| 318 | ALRb | chr1         | + | 121186630 | 121186698 |           |
| 302 | ALRb | chr11        | + | 48816882  | 48819379  |           |
| 337 | ALRb | chr11        | + | 48819495  | 48819517  |           |
| 298 | ALRb | chr11        | + | 54766184  | 54766474  |           |
| 292 | ALRb | chr11        | + | 54768889  | 54769203  |           |
| 323 | ALRb | chr11        | - | 48892530  | 48892592  |           |
| 316 | ALRb | chr11        | + | 48785761  | 48786007  |           |
| 290 | ALRb | chr11        | + | 50657350  | 50657690  |           |
| 297 | ALRb | chr21        | - | 13290008  | 13290297  |           |
| 312 | ALRb | chr18        | + | 15371978  | 15372064  |           |
| 313 | ALRb | chr3         | - | 90436342  | 90436944  |           |
| 334 | ALRb | chr12        | + | 34742862  | 34743063  |           |
| 304 | ALRb | chr12        | + | 36304209  | 36304317  |           |
| 310 | ALRb | chr12        | + | 34730924  | 34731009  |           |
| 314 | ALRb | chr12        | + | 36281989  | 36304007  |           |
| 319 | ALRb | chrX         | + | 61759330  | 61759575  |           |
| 326 | ALRb | chrX         | + | 61675739  | 61675793  |           |
| 300 | ALRb | chr2         | + | 132713494 | 132714300 | ANKRD30BL |
| 286 | ALRb | chr9         | + | 66540569  | 66540729  |           |
| 288 | ALRb | chr9         | + | 69286462  | 69286788  |           |
| 285 | ALRb | chr9         | + | 69280316  | 69280476  |           |
| 294 | ALRb | chr19_random | - | 27687     | 90845     |           |
| 325 | ALRb | chr19_random | - | 90533     | 90588     |           |
| 328 | ALRb | chr10        | + | 41719386  | 41720862  |           |
| 282 | ALRb | chr10        | - | 41849289  | 41849621  |           |
| 267 | ALRb | chr10        | + | 41718661  | 41719338  |           |
| 327 | ALRb | chr10        | + | 41722095  | 41724587  |           |
| 281 | ALRb | chr10        | - | 41848268  | 41849287  |           |
| 269 | ALRb | chr10        | + | 41719339  | 41726616  |           |
| 324 | ALRb | chr10        | - | 41855066  | 41855123  |           |

|     |      |       |   |          |          |  |
|-----|------|-------|---|----------|----------|--|
| 333 | ALRb | chr10 | - | 41847562 | 41847590 |  |
| 272 | ALRb | chr10 | - | 41853361 | 41855050 |  |
| 280 | ALRb | chr10 | - | 41850649 | 41858444 |  |
| 283 | ALRb | chr10 | - | 41847251 | 41861502 |  |
| 291 | ALRb | chr10 | + | 41718710 | 41718999 |  |
| 332 | ALRb | chr10 | + | 41722394 | 41726341 |  |
| 273 | ALRb | chr10 | - | 41850309 | 41850648 |  |
| 305 | ALRb | chr10 | + | 41718575 | 41718660 |  |
| 268 | ALRb | chr10 | + | 41720523 | 41722388 |  |
| 279 | ALRb | chr10 | + | 41719000 | 41727301 |  |
| 299 | ALRb | chr10 | - | 41861861 | 41862144 |  |
| 317 | ALRb | chr10 | - | 41854726 | 41854804 |  |
| 265 | ALRb | chr10 | + | 41720185 | 41720524 |  |
| 270 | ALRb | chr10 | + | 41718321 | 41720184 |  |
| 311 | ALRb | chr10 | + | 41719879 | 41724720 |  |
| 308 | ALRb | chr5  | - | 49442753 | 49443046 |  |
| 306 | ALRb | chr5  | - | 49453819 | 49456328 |  |
| 289 | ALRb | chr5  | - | 46388402 | 46388541 |  |
| 335 | ALRb | chr5  | - | 49467281 | 49467329 |  |
| 293 | ALRb | chr5  | - | 49456033 | 49467755 |  |
| 67  | ALR_ | chr7  | + | 61088208 | 61088378 |  |
| 207 | ALR_ | chr7  | - | 61668891 | 61670727 |  |
| 262 | ALR_ | chr7  | + | 61631205 | 61631224 |  |
| 167 | ALR_ | chr7  | - | 61670728 | 61670883 |  |
| 99  | ALR_ | chr7  | - | 58003882 | 58014811 |  |
| 77  | ALR_ | chr7  | + | 61087354 | 61087524 |  |
| 190 | ALR_ | chr7  | + | 61624219 | 61624387 |  |
| 203 | ALR_ | chr7  | + | 61617470 | 61617584 |  |
| 259 | ALR_ | chr7  | - | 61647392 | 61647413 |  |
| 253 | ALR_ | chr7  | - | 61668684 | 61668705 |  |
| 108 | ALR_ | chr7  | - | 61671510 | 61671850 |  |
| 114 | ALR_ | chr7  | - | 61647243 | 61669023 |  |
| 146 | ALR_ | chr7  | + | 61091784 | 61091946 |  |
| 199 | ALR_ | chr7  | - | 58003920 | 58004052 |  |
| 58  | ALR_ | chr7  | + | 61084118 | 61084799 |  |
| 115 | ALR_ | chr7  | - | 58010710 | 58010880 |  |
| 137 | ALR_ | chr7  | + | 61629501 | 61631033 |  |
| 66  | ALR_ | chr7  | + | 61637869 | 61638209 |  |
| 216 | ALR_ | chr7  | + | 61629600 | 61629668 |  |
| 247 | ALR_ | chr7  | - | 58014474 | 58014500 |  |
| 74  | ALR_ | chr20 | + | 26237177 | 26254987 |  |
| 130 | ALR_ | chr20 | + | 26259429 | 26259599 |  |
| 182 | ALR_ | chr20 | + | 26210710 | 26211038 |  |
| 241 | ALR_ | chr20 | + | 26219900 | 26219927 |  |
| 206 | ALR_ | chr20 | + | 26213272 | 26213386 |  |
| 213 | ALR_ | chr20 | + | 26237084 | 26250153 |  |
| 97  | ALR_ | chr20 | + | 26249538 | 26249708 |  |
| 188 | ALR_ | chr20 | + | 26253633 | 26255123 |  |
| 129 | ALR_ | chr20 | + | 26213217 | 26253794 |  |
| 106 | ALR_ | chr20 | + | 26246975 | 26247145 |  |

|     |      |       |   |          |          |        |
|-----|------|-------|---|----------|----------|--------|
| 164 | ALR_ | chr20 | + | 26236159 | 26237176 |        |
| 140 | ALR_ | chr20 | + | 26219757 | 26236497 |        |
| 197 | ALR_ | chr14 | - | 18077982 | 18082542 |        |
| 252 | ALR_ | chr14 | - | 18111552 | 18111576 |        |
| 194 | ALR_ | chr14 | - | 18106265 | 18111334 |        |
| 156 | ALR_ | chr14 | - | 18126266 | 18126436 |        |
| 95  | ALR_ | chr14 | - | 18105076 | 18111722 |        |
| 83  | ALR_ | chr14 | - | 18084080 | 18091588 |        |
| 248 | ALR_ | chr14 | - | 18111040 | 18111064 |        |
| 239 | ALR_ | chr14 | - | 18091346 | 18091542 |        |
| 139 | ALR_ | chr14 | - | 18082199 | 18105246 |        |
| 135 | ALR_ | chr14 | - | 18113262 | 18113431 |        |
| 119 | ALR_ | chr14 | - | 18077941 | 18092612 |        |
| 103 | ALR_ | chr14 | - | 18078623 | 18084250 |        |
| 179 | ALR_ | chr14 | - | 18075761 | 18076238 |        |
| 46  | ALR_ | chr14 | - | 18080498 | 18111380 |        |
| 171 | ALR_ | chr14 | - | 18091760 | 18106093 |        |
| 222 | ALR_ | chr14 | - | 18106316 | 18106361 |        |
| 128 | ALR_ | chr8  | + | 43889685 | 43889850 |        |
| 105 | ALR_ | chr8  | + | 43906716 | 43907057 |        |
| 131 | ALR_ | chr19 | + | 24417371 | 24418906 |        |
| 122 | ALR_ | chr19 | + | 32460916 | 32462449 |        |
| 48  | ALR_ | chr19 | + | 32454190 | 32462619 |        |
| 162 | ALR_ | chr19 | + | 24395402 | 24395914 |        |
| 144 | ALR_ | chr19 | + | 32437815 | 32437984 |        |
| 264 | ALR_ | chr19 | + | 32462279 | 32462298 |        |
| 133 | ALR_ | chr19 | + | 24400171 | 24401706 |        |
| 110 | ALR_ | chr19 | + | 32462450 | 32470720 |        |
| 159 | ALR_ | chr19 | + | 32459235 | 32461086 |        |
| 161 | ALR_ | chr19 | + | 24398298 | 24398810 |        |
| 185 | ALR_ | chr19 | + | 24415670 | 24417540 |        |
| 94  | ALR_ | chr19 | - | 32578868 | 32579037 |        |
| 236 | ALR_ | chr19 | + | 24418565 | 24418775 |        |
| 160 | ALR_ | chr19 | + | 24412775 | 24413116 |        |
| 184 | ALR_ | chr19 | + | 32454221 | 32454533 |        |
| 211 | ALR_ | chr19 | + | 24400251 | 24400340 |        |
| 173 | ALR_ | chr19 | + | 24401365 | 24414645 |        |
| 229 | ALR_ | chr19 | + | 32470041 | 32470080 |        |
| 132 | ALR_ | chr19 | + | 24414476 | 24416011 |        |
| 242 | ALR_ | chr19 | + | 32459543 | 32459570 |        |
| 123 | ALR_ | chr6  | - | 61959725 | 61960062 |        |
| 200 | ALR_ | chr6  | - | 61974235 | 61974349 |        |
| 260 | ALR_ | chr6  | - | 61962600 | 61962619 |        |
| 202 | ALR_ | chr6  | - | 61972184 | 61972306 |        |
| 54  | ALR_ | chr6  | - | 61962449 | 61972352 |        |
| 90  | ALR_ | chr11 | + | 48785837 | 48819892 |        |
| 71  | ALR_ | chr11 | - | 54779356 | 54782252 | TRIM48 |
| 227 | ALR_ | chr11 | + | 48786315 | 48786348 |        |
| 244 | ALR_ | chr11 | - | 54778130 | 54778328 |        |
| 136 | ALR_ | chr11 | - | 54778158 | 54779682 |        |

|     |      |       |   |          |          |        |
|-----|------|-------|---|----------|----------|--------|
| 88  | ALR_ | chr11 | - | 48891818 | 48892187 |        |
| 72  | ALR_ | chr11 | - | 48893383 | 48893553 |        |
| 240 | ALR_ | chr11 | - | 54782082 | 54782111 | TRIM48 |
| 120 | ALR_ | chr11 | - | 48774145 | 48774826 |        |
| 57  | ALR_ | chr11 | - | 48904961 | 48905131 |        |
| 192 | ALR_ | chr11 | + | 48786053 | 48786178 |        |
| 59  | ALR_ | chr11 | + | 48786179 | 48821996 |        |
| 92  | ALR_ | chr11 | + | 48834143 | 48834309 |        |
| 178 | ALR_ | chr11 | + | 48819722 | 48823708 |        |
| 151 | ALR_ | chr11 | - | 54770140 | 54770310 |        |
| 89  | ALR_ | chr11 | - | 48914933 | 48915103 |        |
| 148 | ALR_ | chr11 | + | 48789994 | 48790163 |        |
| 104 | ALR_ | chr11 | - | 54773726 | 54773896 |        |
| 155 | ALR_ | chr11 | + | 48819210 | 48819379 |        |
| 189 | ALR_ | chr11 | - | 48920405 | 48920527 |        |
| 225 | ALR_ | chr11 | - | 48913177 | 48913563 |        |
| 91  | ALR_ | chr11 | + | 48824905 | 48825246 |        |
| 205 | ALR_ | chr11 | - | 48913393 | 48913495 |        |
| 154 | ALR_ | chr11 | + | 48852989 | 48853138 |        |
| 214 | ALR_ | chr11 | - | 54779398 | 54779479 |        |
| 257 | ALR_ | chr11 | + | 48852797 | 48852817 |        |
| 96  | ALR_ | chr11 | - | 54774740 | 54775080 |        |
| 85  | ALR_ | chr11 | + | 48836362 | 48836703 |        |
| 258 | ALR_ | chr11 | + | 48821826 | 48821848 |        |
| 153 | ALR_ | chr11 | + | 48849746 | 48849916 |        |
| 98  | ALR_ | chr11 | + | 48850942 | 48851112 |        |
| 56  | ALR_ | chr11 | - | 48902903 | 48903244 |        |
| 86  | ALR_ | chr11 | + | 48849233 | 48849403 |        |
| 62  | ALR_ | chr11 | - | 48909974 | 48910315 |        |
| 81  | ALR_ | chr21 | - | 13287448 | 13287618 |        |
| 201 | ALR_ | chr21 | - | 13260062 | 13260368 |        |
| 118 | ALR_ | chr21 | - | 13260027 | 13273084 |        |
| 102 | ALR_ | chr21 | - | 13290008 | 13290347 |        |
| 224 | ALR_ | chr21 | - | 13272914 | 13290472 |        |
| 245 | ALR_ | chr16 | + | 35141344 | 35141712 |        |
| 177 | ALR_ | chr16 | + | 35103896 | 35104060 |        |
| 196 | ALR_ | chr16 | + | 35141570 | 35141684 |        |
| 176 | ALR_ | chr16 | + | 35108672 | 35108836 |        |
| 238 | ALR_ | chr3  | - | 90499730 | 90499757 |        |
| 149 | ALR_ | chr3  | - | 90571139 | 90573856 |        |
| 124 | ALR_ | chr3  | - | 90573008 | 90573178 |        |
| 210 | ALR_ | chr3  | - | 90499627 | 90542374 |        |
| 230 | ALR_ | chr3  | - | 90579814 | 90579844 |        |
| 168 | ALR_ | chr3  | - | 90499587 | 90538314 |        |
| 101 | ALR_ | chr3  | - | 90576071 | 90576410 |        |
| 255 | ALR_ | chr3  | - | 90542034 | 90542054 |        |
| 43  | ALR_ | chr3  | - | 90538144 | 90571306 |        |
| 117 | ALR_ | chr3  | - | 90532983 | 90533322 |        |
| 175 | ALR_ | chr3  | - | 90573689 | 90580154 |        |
| 187 | ALR_ | chr3  | - | 90549178 | 90549342 |        |

|     |      |       |   |           |           |           |
|-----|------|-------|---|-----------|-----------|-----------|
| 223 | ALR_ | chr3  | - | 90538657  | 90573810  |           |
| 55  | ALR_ | chr3  | - | 90531107  | 90538998  |           |
| 49  | ALR_ | chr15 | - | 18265018  | 18265700  |           |
| 226 | ALR_ | chr15 | - | 18265189  | 18265358  |           |
| 147 | ALR_ | chr12 | + | 34743370  | 34743530  |           |
| 84  | ALR_ | chr12 | + | 34729179  | 34729683  |           |
| 233 | ALR_ | chr12 | + | 36301789  | 36301825  |           |
| 165 | ALR_ | chr12 | - | 36319440  | 36319608  |           |
| 68  | ALR_ | chr12 | + | 36282954  | 36301959  |           |
| 166 | ALR_ | chr12 | + | 36297256  | 36297420  |           |
| 215 | ALR_ | chr12 | + | 36301845  | 36301923  |           |
| 232 | ALR_ | chr12 | + | 36283430  | 36283634  |           |
| 157 | ALR_ | chr12 | - | 36316546  | 36316711  |           |
| 237 | ALR_ | chrX  | - | 61660087  | 61660123  |           |
| 152 | ALR_ | chrX  | + | 61666159  | 61666643  |           |
| 217 | ALR_ | chrX  | + | 61743881  | 61746611  |           |
| 204 | ALR_ | chrX  | - | 61660457  | 61660739  |           |
| 53  | ALR_ | chrX  | - | 61659953  | 61660966  |           |
| 234 | ALR_ | chrX  | + | 61728451  | 61728485  |           |
| 142 | ALR_ | chrX  | - | 58575808  | 58576146  |           |
| 107 | ALR_ | chrX  | - | 61663679  | 61664017  |           |
| 44  | ALR_ | chrX  | + | 61734152  | 61741834  |           |
| 126 | ALR_ | chrX  | + | 61678865  | 61734322  |           |
| 75  | ALR_ | chrX  | + | 61746442  | 61750537  |           |
| 250 | ALR_ | chrX  | + | 61772119  | 61772142  |           |
| 47  | ALR_ | chrX  | + | 61739277  | 61739789  |           |
| 52  | ALR_ | chrX  | + | 61731759  | 61731929  |           |
| 60  | ALR_ | chrX  | - | 61659444  | 61659781  |           |
| 172 | ALR_ | chrX  | + | 58568811  | 58568981  |           |
| 209 | ALR_ | chrX  | + | 61771975  | 61772280  |           |
| 256 | ALR_ | chrX  | + | 61679171  | 61679191  |           |
| 76  | ALR_ | chrX  | + | 61728317  | 61744051  |           |
| 87  | ALR_ | chr2  | + | 132714985 | 132715325 | ANKRD30BL |
| 174 | ALR_ | chr2  | + | 132692441 | 132713790 | ANKRD30BL |
| 263 | ALR_ | chr2  | + | 132713962 | 132713981 | ANKRD30BL |
| 249 | ALR_ | chr2  | + | 132692758 | 132692782 | ANKRD30BL |
| 235 | ALR_ | chr2  | + | 132713723 | 132713755 | ANKRD30BL |
| 218 | ALR_ | chr2  | + | 132714003 | 132714063 | ANKRD30BL |
| 143 | ALR_ | chr2  | + | 132690507 | 132690901 | ANKRD30BL |
| 113 | ALR_ | chr2  | + | 132703602 | 132703943 | ANKRD30BL |
| 63  | ALR_ | chr9  | + | 69270265  | 69288153  |           |
| 198 | ALR_ | chr9  | + | 69287526  | 69287641  |           |
| 158 | ALR_ | chr9  | + | 69238202  | 69238372  |           |
| 212 | ALR_ | chr9  | + | 69270511  | 69270606  |           |
| 186 | ALR_ | chr9  | + | 66528010  | 66551654  |           |
| 65  | ALR_ | chr9  | + | 66557123  | 66562236  |           |
| 221 | ALR_ | chr9  | + | 66562237  | 66562295  |           |
| 251 | ALR_ | chr9  | + | 66528116  | 66528139  |           |
| 261 | ALR_ | chr9  | + | 69287812  | 69287831  |           |
| 64  | ALR_ | chr9  | + | 66527628  | 66548415  |           |

|     |      |              |   |          |          |  |
|-----|------|--------------|---|----------|----------|--|
| 228 | ALR_ | chr9         | + | 69270647 | 69270681 |  |
| 220 | ALR_ | chr9         | + | 66548074 | 66561834 |  |
| 109 | ALR_ | chr9         | + | 66555415 | 66555755 |  |
| 254 | ALR_ | chr9         | + | 66557101 | 66557122 |  |
| 145 | ALR_ | chr9         | + | 67008080 | 67008234 |  |
| 73  | ALR_ | chr9         | + | 66551313 | 66555242 |  |
| 170 | ALR_ | chr19_random | - | 37714    | 39076    |  |
| 50  | ALR_ | chr19_random | - | 4305     | 85594    |  |
| 134 | ALR_ | chr19_random | - | 16545    | 16715    |  |
| 70  | ALR_ | chr19_random | - | 23593    | 36351    |  |
| 51  | ALR_ | chr19_random | - | 47235    | 47405    |  |
| 193 | ALR_ | chr19_random | - | 21545    | 85547    |  |
| 69  | ALR_ | chr19_random | - | 27516    | 37881    |  |
| 112 | ALR_ | chr19_random | - | 49795    | 71783    |  |
| 191 | ALR_ | chr19_random | - | 89340    | 89478    |  |
| 180 | ALR_ | chr19_random | - | 29052    | 29390    |  |
| 93  | ALR_ | chr19_random | - | 11120    | 21714    |  |
| 169 | ALR_ | chr19_random | - | 49112    | 49282    |  |
| 125 | ALR_ | chr19_random | - | 10607    | 10777    |  |
| 45  | ALR_ | chr19_random | - | 45871    | 89510    |  |
| 150 | ALR_ | chr19_random | - | 39928    | 40091    |  |
| 82  | ALR_ | chr19_random | - | 38222    | 38392    |  |
| 231 | ALR_ | chr9_random  | + | 389768   | 389798   |  |
| 163 | ALR_ | chr9_random  | + | 398402   | 398742   |  |
| 127 | ALR_ | chr9_random  | + | 389638   | 410520   |  |
| 219 | ALR_ | chr9_random  | + | 410520   | 410593   |  |
| 61  | ALR_ | chr9_random  | - | 936890   | 937400   |  |
| 121 | ALR_ | chr9_random  | + | 394008   | 394337   |  |
| 79  | ALR_ | chr9_random  | - | 935534   | 935875   |  |
| 246 | ALR_ | chr5         | - | 46392814 | 46392839 |  |
| 181 | ALR_ | chr5         | + | 46414728 | 46415054 |  |
| 183 | ALR_ | chr5         | - | 46379361 | 46379702 |  |
| 138 | ALR_ | chr5         | - | 46368838 | 46369172 |  |
| 208 | ALR_ | chr5         | - | 46372089 | 46372218 |  |
| 111 | ALR_ | chr5         | - | 46375276 | 46375617 |  |
| 80  | ALR_ | chr5         | - | 49465568 | 49466080 |  |
| 78  | ALR_ | chr5         | + | 46404427 | 46415410 |  |
| 243 | ALR_ | chr5         | - | 46377121 | 46377319 |  |
| 116 | ALR_ | chr5         | - | 46372050 | 46392975 |  |
| 141 | ALR_ | chr5         | + | 46427314 | 46427484 |  |
| 100 | ALR_ | chr5         | - | 46376978 | 46380381 |  |
| 195 | ALR_ | chr5         | + | 46404820 | 46405094 |  |
