# Supplementary material for: The landscape of DNA repeat elements in human heart failure
Source: PubMed Central journal article supplement (PMC3491418; doi:10.1186/gb-2012-13-10-r90), 2012-10-03

A

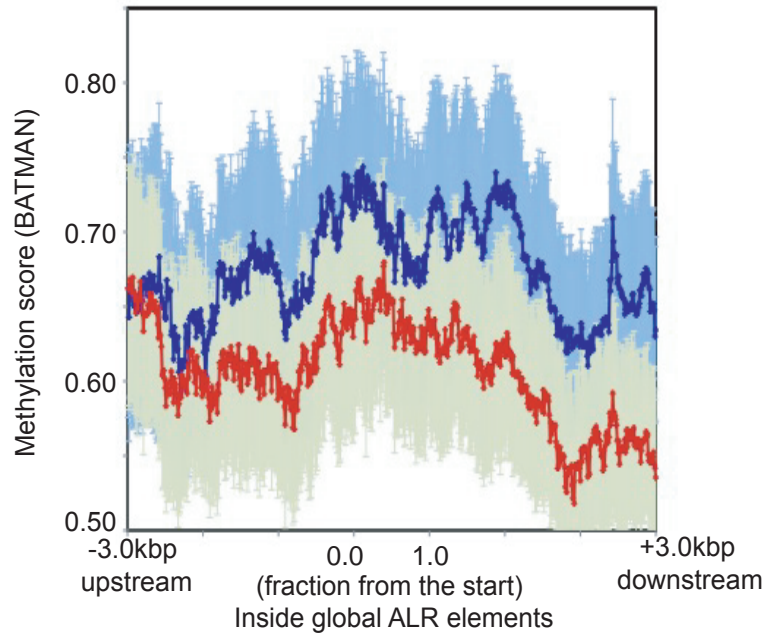

B

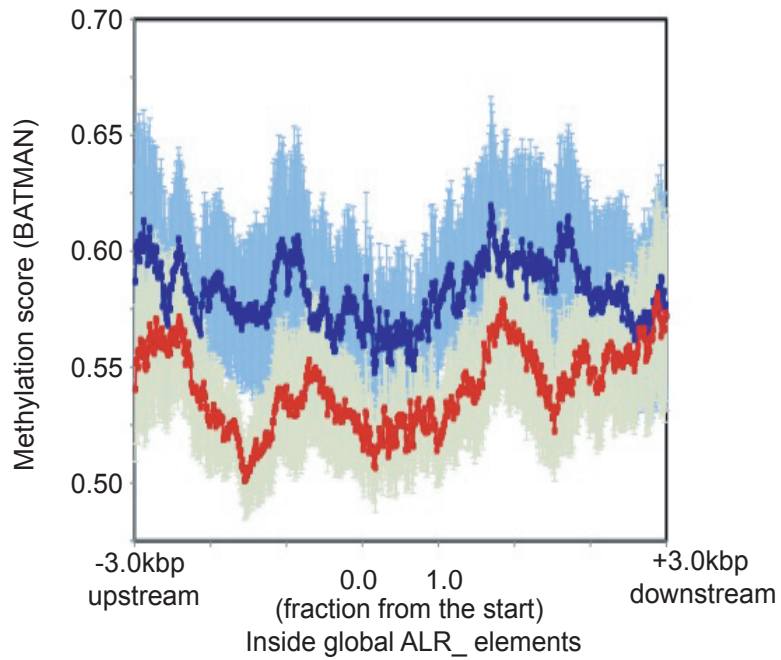

C

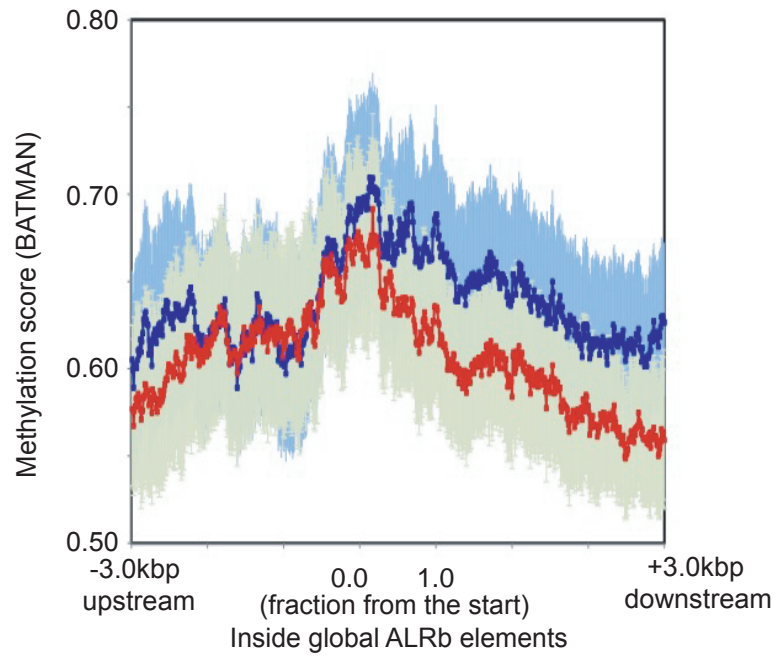

Supplement: gb-2012-13-10-r90-S11.pdf [file gb-2012-13-10-r90-S11.pdf]
